# 1 **Behavioural synchronization in a multilevel** 2 **society of feral horses**

3 Tamao Maeda<sup>1\*</sup>, Cédric Sueur<sup>2,3</sup>, Satoshi Hirata<sup>1</sup> and Shinya Yamamoto<sup>4</sup>

4

## 5 **Affiliations:**

6 <sup>1</sup>Wildlife Research Centre, Kyoto University

7 <sup>2</sup>Institut Pluridisciplinaire Hubert Curien, Université de Strasbourg, CNRS

8 <sup>3</sup>Institut Universitaire de France, Paris

9 <sup>4</sup>Institute of Advanced Study, Kyoto University

10

11 \*correspondence to: Tamao Maeda ([tamao@powarch.com](mailto:tamao@powarch.com))

12

13

## 14 **SUMMARY**

15 Behavioural synchrony among individuals is essential for group-living organisms. It is still largely  
16 unknown how synchronization functions in a multilevel society, which is a nested assemblage of  
17 multiple social levels between many individuals. Our aim was to build a model that explained the  
18 synchronization of activity in a multilevel society of feral horses. We used multi-agent based models  
19 based on four hypotheses: A) horses do not synchronize, B) horses synchronize with any individual  
20 in any unit, C) horses synchronize only within units and D) horses synchronize across and within  
21 units, but internal synchronization is stronger. Our empirical data obtained from drone observations  
22 best supported hypothesis D. This result suggests that animals in a multilevel society coordinate with  
23 other conspecifics not only within a unit but at an inter-unit level. In this case, inter-individual  
24 distances are much longer than those in most previous models which only considered local  
25 interaction within a few body lengths.

26

27

## 28 **Introduction**

29 Behavioural synchronization is the phenomena where multiple individuals perform the  
30 same behaviours at the same time by mirroring each other, either consciously or unconsciously  
31 (Duranton and Gaunet, 2016). The patterns of synchronous activity have been found in many  
32 animals and with many different behaviours, from Placozoa to humans (Couzin, 2018). The  
33 common property of this collective behaviour is that relatively simple interactions among the  
34 members of the group can explain a global pattern of behaviour (Couzin and Krause, 2003). For  
35 example, a pattern of fission-fusion in some ungulate species could be simply explained by the  
36 dynamic tension between the advantages of aggregation and the disagreement among  
37 mainly between female and males, due to the variation in resource demand (Bonenfant et al.,  
38 2004; Mooring et al., 2005). Synchronization of behaviour is essential for animals to maintain  
39 functions of a group, and thus enhance their fitness and survival (Duranton and Gaunet, 2016).  
40 Fundamentally, animals need to synchronize the timing and direction of their movements to  
41 an aggregation (Couzin and Krause, 2003). Furthermore, it has been reported that  
42 synchronization can increase efficiency in their vigilance and defensive behaviours (like  
43 mobbing) to predators (Kastberger et al., 2008), as well as facilitating social interactions and  
44 enhancing social bonds (Ancel et al., 2009; McIntosh, 2006).

45 Many studies on synchronization were done on cohesive, single-layered groups, either  
46 natural or experimental setup (Bialek et al., 2014; Kastberger et al., 2008; King et al., 2011;  
47 Torney et al., 2018). In many social animals, social networks have a considerable effect on the  
48 propagation of behaviour (Centola, 2010; Couzin, 2018; King et al., 2008; Papageorgiou and  
49 Farine, 2020; C. Sueur et al., 2011; Sueur and Deneubourg, 2011). Socially central individuals  
50 can have a greater influence on group behaviour than subordinate individuals (Sueur et al., 2012,  
51 2009). Also, it is widely observed that socially affiliated dyads more intensely synchronize their  
52 behaviours (Briard et al., 2015; King et al., 2011). However, most of these studies which  
53 examine the social network effect were conducted on small, cohesive groups (but see  
54 Papageorgiou and Farine, 2020) whilst studies with large groups of individuals were based on  
55 anonymous mechanisms because of the difficulty in identifying and following all members.

56 Multilevel societies composed of nested and hierarchical social structures are  
57 considered to be among the most complex forms of social organization for animals (Grueter et  
58 al., 2020, 2017, 2012). In a multilevel society, the fundamental component is called as a 'unit',  
59 and these units gather to form larger groups. It is often reported that the different units also  
60 forage and sleep together (Papageorgiou et al., 2019; Swedell and Plummer, 2012). The most

61 famous example of multilevel society is the troop, a third or fourth level social organization, of  
62 hamadryas baboons sleeping together in a cliff (Schreier and Swedell, 2009). It is highly likely  
63 that synchrony occurs not only among the same units but also in a higher-level of social  
64 organization, but studies on their synchronization mechanisms and functions are quite limited  
65 (but see Ozogány and Vicsek, 2014).

66 Multilevel society is characterized by a different association pattern in each social level.  
67 Usually, members of a unit stay close together, while the extent of cohesion becomes smaller  
68 as the social level increases (Grueter et al., 2012; Maeda et al., 2021; Papageorgiou et al.,  
69 2019; Qi et al., 2014; Snyder-Mackler et al., 2012). Some studies have found that different  
70 units keep an intermediate distance from each other, staying farther apart than the  
71 inter-individual distance within units (Bowler et al., 2012), but closer than random distribution  
72 (Maeda et al., 2021). It is argued that this differentiation of social relationships has evolved to  
73 balance the advantages of being a large-group and the disadvantages of resource competition  
74 with other units (Moscovice et al., 2020; Rubenstein and Hack, 2004; Sueur et al., 2011). For  
75 example, a study on golden snub-nosed monkeys (*Rhinopithecus roxellana*) suggested that  
76 harem unit aggregation could reduce a risk of inbreeding and bachelor threat, but being a large  
77 group may cause intense competition for food, so their aggregation pattern changes according  
78 to the seasonal prevalence of resources (Qi et al., 2014). We assumed that this fission-fusion  
79 patterns which balances competition and cooperation between units could be also applied to  
80 behavioural synchronization. Whether multi-level societies show behavioural synchronization  
81 remains unclear, but it is important to address this question in order to better understand the  
82 collective features of such societies.

83 New technologies enable more wide ranging and accurate data collection in societies  
84 with hundreds of individuals (Charpentier et al., 2021; Inoue et al., 2019; Schroeder et al., 2020).  
85 For instance, our use of drones succeed in obtaining positional and behavioural data of a  
86 multilevel society composed of more than a hundred of feral horses in Portugal and showed a  
87 two layered structure of units (combinations of individuals which stayed closer than 15.5m  
88 more than 70% of the time) nested within a herd (i.e. observed inter-unit distance was  
89 significantly smaller than that of permuted data sets) (Maeda et al., 2021). In the current study,  
90 we further apply this data collection to investigate whether horse multilevel society shows  
91 synchrony in resting/moving timing, and if so, whether the extent of synchronization changes  
92 within and across units.

93 We hypothesize that (1) horses synchronize their behaviour both at an intra- and

94 inter-unit level, and (2) the extent of synchronization in a dyad is correlated to its social  
95 relationships. In this current study, we develop different models based on hypotheses ranging  
96 from no synchronization between individuals and units to full synchronization, with  
97 intermediate mechanisms based on social networks. In this way, we develop a stochastic  
98 multi-agent based model where the probability of an individual to change stage (resting versus  
99 moving) depends on different hypotheses: (A) Independent: horses do not synchronize and are  
100 socially independent. This hypothesis is used as the null model. (B) Anonymous: horses  
101 synchronize with any individual in any unit. This hypothesis does not include the importance of  
102 stable social relationships in trade-off between group-living advantages and competition. (C)  
103 Unit-level social: horses synchronize only within units, not considering the herd-level  
104 association and without advantages of large societies. (D) Herd-level social: horses synchronize  
105 across and within units, but internal synchronization is stronger (Figure 1). Hypothesis D could  
106 achieve the best balance between the intra and inter-unit level associations. Finally, we  
107 compared these models to the empirical data in order to assess which models best explain  
108 synchronization in our population of feral horses.

109

## 110 **Method**

### 111 **(a) Data collection**

112 We conducted observations from June 6th to July 10th, 2018 in Serra D'Arga, Portugal,  
113 where approximately 150 feral horses were living without human care (Ringhofer et al., 2017).  
114 The field site had two large flat areas, Zone 1 and 2, which were visually separated by rocky  
115 hills (see Figure 3 of Maeda et al., 2021). We separated these areas because we rarely observed  
116 horses moving between them during daytime. We used drones (Mavic Pro: DJI, China) to  
117 accurately measure distances between all individuals in the observation area of two zones  
118 covering approximately 1 km<sup>2</sup> each. The flights were performed under clear sky conditions at an  
119 altitude of 30–50 m from the ground and we took successive aerial photographs of the horses  
120 present at the site in 30-minute intervals from 9:00–18:00 (for more detailed explanation see  
121 Maeda et al., 2021). The average duration of each flight was 4 minutes 24 seconds ± 3 minutes  
122 5 seconds.

123 Orthomosaic imaging was conducted using AgiSoft PhotoScan Professional software.  
124 The software connected successive photos and created orthophotographs in the GeoTIFF format  
125 under the WGS 84 geographic coordinate system. We first identified all horses from the ground  
126 and made an identification sheet for all individuals, recording their sex (whether they had testes),

127 estimated age class, and physical characteristics such as colour, body shape, and white markings  
128 on the face and feet (Fig. 2). The adults were individuals who experienced dispersal from their  
129 natal group, the young were those who were born in or before 2017 and still belonged to their  
130 natal group, and the infants were individuals born in 2018. All horses in the orthophotographs  
131 were identified accordingly. We positioned the heads of the horses and recorded whether they  
132 were resting or not. The horses were considered to be resting if they did not move in the  
133 successive photos and showed resting posture, i.e., laying down or standing still with their neck  
134 parallel to the ground. Otherwise, we considered them to be moving. All locations were stored  
135 in shapefile formats. The coordinate system was converted to a rectangular plain WGS 84 /  
136 UTM Zone 29N and we then calculated the distances between all pairs of individuals in the  
137 same zone. In total, 243 observations were conducted in 20 days and a total of 23,716 data  
138 points of individual positions were obtained (for detailed availability and number of  
139 observations each day, see Figure S3). A total of 126 non-infant horses (119 adults: 82 females  
140 and 37 males, 7 young individuals: 6 females and 1 male) and 19 infants (11 females and 8  
141 males) were successfully identified. They belonged to 23 units (21 harems and 2 AMUs;  
142 all-male unit), along with 5 solitary males. One adult female, named Oyama from Kanuma  
143 harem, disappeared sometime between the evening of June 15th and morning of June 16th,  
144 probably predated by wolves. We eliminated this female and two solitary males which never  
145 located within 11m of other individuals from the subsequent analysis. We also eliminated  
146 infants because their position was highly dependent on their mothers.

147

#### 148 **b) Herd social network**

149 To create a social network, we first decided the threshold distance which defines the  
150 association. We created a histogram of inter-individual distance data under the R environment.  
151 The bin width was decided based on the method used in Wand (1999) and using R package  
152 ‘KernSmooth’ (Wand, 2015). As shown in Figure 2, the histogram had two peaks – at the 2nd  
153 bin (0.9-1.8m) and at the 55th bin (49.7-50.6m) with a bin-width of 0.92m. The minimum  
154 frequency, or nadir, between these two peaks was observed at the 12th bin (10.1-11.0m), and we  
155 selected this as the threshold distance that divides the intra- and inter-unit association (cf.  
156 Maeda et al., 2021).

157 To obtain the social relationships for each dyad  $a_{ik}$ , networks were generated for each  
158 sampling period (i.e., each flight of drones). Pairs of horses whose inter-individual distance was  
159 smaller than 11 meters were assigned an edge weight of 1, based upon the threshold distance

160 defined above. When a pair of individuals were connected with each other indirectly via another  
161 individual, they were also considered to be connected (edge weight = 1). All other pairs were  
162 assigned an edge weight of 0. In the total number of drone flights, we detected 658 temporarily  
163 isolated individuals who had no association with any other individuals. If the distance from the  
164 nearest individual was smaller than  $p_2$  (the second peak of the histogram), we presumed that  
165 they had an association with the nearest neighbour, otherwise we eliminated them from the  
166 analysis. 643 out of 658 isolated points were within 50.6 m (the second peak of histogram) from  
167 the nearest individual. A social network was created from this co-membership data using the  
168 simple ratio index (Cairns and Schwager, 1987). This calculates the probability that two  
169 individuals are observed together given that one has been seen, which is widely used in animal  
170 social network analysis. The density of the network was  $0.047 \pm 0.177$  (average  $\pm$  SD). The  
171 edge weight was normalized so that the sum of  $a_{ik}$  ( $k=1,2,\dots, N; k \neq i$ ) became  $N$  (in other words,  
172 average network weight became 1.0).

173

174

### 175 **c) Synchronization data scoring and calculation of modelling parameters**

176 *Population synchronization rate:* We scored at each time step (in our case, a scan every  
177 30 minutes) the number  $N$  of horses and their identities in each state ( $S_r$  for resting and  $S_m$  for  
178 moving). As explained in (a), resting is standing still or laying down, and moving is any other  
179 behaviour, mainly grazing. We only used observations when more than 90% (21 out of 23) of  
180 units were available in the field. We observed 21–23 units in 8 days out of 19 days during June  
181 14<sup>th</sup>–28<sup>th</sup> and July 5<sup>th</sup>. We did not include July 5<sup>th</sup> data, although 21 units were available, since  
182 horses foraged in the edge of the field site, rocky area with many obstacles, which may limit  
183 their vision. One AMU was not observed on 15<sup>th</sup> and 16<sup>th</sup>, and one harem and one AMU were  
184 not observed on the 28<sup>th</sup> (Figure S3). We defined a synchronization rate of a dyad as a  
185 proportion of the observation when two individuals were in the same activity state, i.e., we  
186 scored 1 when two individuals were in a same state (e.g., resting or moving respectively) in an  
187 observation and 0 when not, and then calculated its average.

188 *Individual synchronization/state phase latency:* We defined a synchronization phase  $P_{r,m}$   
189 as a ‘resting  $\rightarrow$  moving’ event when there was a continuous decrease of resting individuals from  
190 the minimal to the maximal, and a phase  $P_{m,r}$  ‘moving  $\rightarrow$  resting’ event as the opposite (Figure  
191 4). We excluded the increase/decrease from the first observation or the last observation of the  
192 day. In total, we found 21 moving  $\rightarrow$  resting events and 18 resting  $\rightarrow$  moving events. We

193 calculated the state phase latency  $\Delta T_{01s}$  as the time elapsed between the end of one state phase  
194 and the beginning of the next one. This phase latency corresponds to the departure latency on an  
195 individual to change state in previous works (Bourjade et al., 2009; Sueur et al., 2010, 2009;  
196 Sueur and Deneubourg, 2011).  $\Delta T_{01r}$  corresponds to the resting phase latency and  $\Delta T_{01m}$  to the  
197 moving phase latency (Table 1, Figure S1). For explanations of modelling self-organisation and  
198 collectives, see also Sueur and Deneubourg (2011).

199 *Individual refractory period:* Many synchronization processes in animal groups imply a  
200 refractory period, which is the short time period after an individual has changed their state and  
201 then appears insensitive to its neighbours (Couzin, 2018, 2009). Theoretical studies showed that  
202 this period is necessary for animals to not be stuck in a state (Couzin, 2018, 2009), and  
203 preliminary works on our model also showed that, to avoid observing agents being stuck in a  
204 state, the refractory period is necessary. According to the observed data, the mean refractory  
205 period for moving was 50 minutes and 25 minutes for resting (Figs. S3, S4). We used these  
206 values as well as lower and higher values of the refractory period to check the fitness of  
207 simulations to the empirical data (see supplementary material and section (d)). We then scored  
208 the changing state latency  $\Delta T_{j-1,j,s}$  of each horse  $j$  changing state  $s$  corresponding to the time  
209 elapsed between the state change of the individual  $j - 1$  (i.e., the previous individual changing  
210 state  $s_1$  to  $s_2$ , and the state change of the horse  $j$  (changing also from  $s_1$  to  $s_2$ ). The expected  
211 value of  $\Delta T_{j-1,j,m}$  and  $\Delta T_{j-1,j,r}$  were 2.3 and 1.3 minutes respectively (Table 1, Figure S2).

212

#### 213 **(d) The models**

214 Our aims were to understand the synchronization process of horses between two  
215 states—moving and resting—throughout the day. We considered that, in multilevel society,  
216 individuals synchronize across and within units but their internal synchronization is stronger. In  
217 other words, the synchronization should be similar to their spatial association pattern, where  
218 intra-unit cohesion is quite strong but the inter-unit cohesion is moderate.

219 According to the preliminary analysis, the horses' resting/moving was independent of  
220 the time of day (see Supplementary Appendix for detailed explanation), so we did not consider  
221 the effect of time in the following models.

222

223 *Model design:* The overall design of the models is shown in Figure 1. The model is  
224 stochastic and individualistic (Couzin, 2009; Sueur and Deneubourg, 2011), meaning that we  
225 consider the probability of each individual to change state, and not the collective probability or



226 state. We followed this concept as we introduced the selective mimetism (mimetism based on  
227 social relationships) as a hypothesis and this can be done only with calculating probabilities per  
228 individuals (Sueur et al., 2009; Sueur and Deneubourg, 2011). This bottom-up approach is also  
229 better than the top-down one for understanding individual decision processes. We obtained the  
230 probability of individuals to change states, mimetic-coefficient and refractory time period of  
231 resting/moving and social relationships from the data set (Table 1, details about calculations are  
232 given below). The probability  $\Psi_1 (N\lambda)$ , mimetic coefficient C, and refractory time period  $\Delta T_{01}$   
233 ( $=1/\Psi_1$ ) of moving were calculated as 0.04, 0.796 and 25 minutes, and those of resting were  
234 0.02, 0.426 and 50 minutes, respectively (Table 1, Figure S1 and S2). We ran a simulation (one  
235 day) extending 9 hours (540 minutes) with 18 observations, and we repeated the simulations  
236 100 times for each hypothesis. We also tested the model with different parameter sets to  
237 investigate its robustness (Supplementary Appendix “Comparisons of models under various  
238 parameters”).

239

240

241 *Individual probability of changing state:* As the distribution of the state latencies  
242 corresponded to an exponential distribution (figure S3), the probability of an individual  
243 changing its state was the log gradient of this exponential distribution, that is, the inverse of the  
244 mean state latency (Sueur et al., 2009):

$$\Psi_{1,s} = \sum_{i=1}^N \lambda_{i,s}$$

245 We assumed that all individuals may have the same mean latency while their probability of  
246 changing their state might differ. The mean latencies to start event are equal irrespective of the  
247 individual:

$$\Delta T_{01,s} = \frac{1}{\Psi_{01,s}}$$

248 as explained above, we also defined  $\Delta T_{01}$  as a refractory time period in the simulations.

249 *Mimetic coefficient:* In a mimetic process where the probability of changing state is  
250 proportional to the number of individuals already in this state, the probability per unit time that  
251 individual i changes state is:

$$\psi_{i,s} = \lambda_s + C n_s$$

252 where C was the mimetic coefficient per individual and  $j_s$  is the number of individuals in the  
253 state s, either R for resting or M for moving. As  $\psi_i$  is same for all the individuals in the herd,



254 the mimetic coefficient  $C$  could be obtained from the inverse of the average  $T_{jj-1}$ ,  $1/E[\Delta T_{jj-1}]$   
255 ( $j=2,3,\dots$ ). We calculated the parameters  $C$  and  $\Delta T_{01}$  using survival analysis (figures S3 and S4  
256 respectively) and quadratic functions (see results and figures 5 and 6 respectively).

257

258 *Models based on the different hypotheses:* We tested different sub-models (figure 1)  
259 based on each hypothesis, presented here for i to iii. Overall, we tested seven models: (A)  
260 independent, (Ba) absolute anonymous, (Bb) proportional anonymous, (Ca) unit-level absolute  
261 social, (Cb) unit-level proportional social, (Da) herd-level absolute social, and (Db) herd-level  
262 proportional social model.

263

264 (i) Independent hypothesis (model A)

265 The first hypothesis assumed that horses were independent: the probability of an  
266 individual changing their state is not influenced by the state of any other members. Under this  
267 hypothesis, the probability that one of the agents (e.g., individual  $i$ ) changes state per unit time  
268 was  $\lambda_{i,s}$ . Considering the refractory period, the probability  $\psi_i$  is equal to  $\lambda = \Psi_{01}/N$  when  $\Delta t_i$   
269  $< \Delta T_{01,s}$  and is equal to 1 when  $\Delta t_i = \Delta T_{01,s}$ .

270 This model corresponds to a null model.

271

272 (□) Anonymous hypotheses (model Ba and Bb)

273 The second hypothesis specified that horses synchronize with all the herd members  
274 anonymously. In the absolute anonymous model (model Ba), individuals will change state  $s$   
275 according to the absolute (i.e., not proportional) number of herd members in this state  $s$   
276 (respectively number  $R$  for state  $r$  and number  $M$  for state  $m$ ). To test this hypothesis, we added  
277 a mimetic coefficient  $C$  in the independent model, which indicated the strength of the collective  
278 process.

279 Considering the refractory time period, the  $n$  resting agents became the joiner  $j+1$  under  
280 the model Ba was obtained from equation:

$$\psi_{i,s} = \min \left\{ \frac{1}{\Delta T_{01,s} - \Delta t_i}, \lambda_s + C n_s \right\}$$

281 when  $\Delta t_i < \Delta T_{01,s}$ . It is equal to 1 when  $\Delta t_i = \Delta T_{01,s}$  (this is same for all the models, so we only  
282 refer to the probability when  $\Delta t_i < \Delta T_{01,s}$ ). The equation shows that when  $\Delta t_i$  is small, that is,  
283 soon after an individual changed its state (beginning of a refractory period), it is less likely to be  
284 influenced by other individuals' states.

285 We created another model based on the proportional number of individuals in state  $s$ ,  
 286 where the probability of changing state  $s1$  depends on the number of individuals in state  $s1$   
 287 divided by the number of individuals in state  $s2$  (model Bb). The probability of individuals in  $s2$   
 288 to go in state  $s1$  is:

$$\psi_{i,s1} = \min \left\{ \frac{1}{\Delta T_{01,s1} - \Delta t_i}, \lambda_{s1} + C \frac{n_{s1}}{n_{s2}} \right\}$$

289 As  $n_{s1} = N - n_{s2}$ , the response of individuals become reciprocal, not linear like the anonymous  
 290 model.

291

292 (iii) Social hypothesis (model Ca, Cb, Da and Db)

293 In these hypotheses, we tested the influence of the social relationships between units or  
 294 herd members on the decision to join. Unit-level social hypothesis (model Ca and Cb) assumed  
 295 the synchrony happened only among unit members, while herd-level social hypothesis (models  
 296 Da and Db) considered both intra- and inter-unit sociality. Within these two social hypotheses,  
 297 we tested two models: one taking the absolute numbers of individuals in each state (model Ca  
 298 and Da), another one taking the proportion as described for the anonymous mimetic models (Cb  
 299 and Db).

300 Models Ca and Da considered the individual identities and the social relationships of  
 301 each dyad. Each observed social relationship of the study herd was implemented in the model,  
 302 allowing us to consider differences in social relationships between dyads. The probability per  
 303 unit time that one of the  $n_{s2}$  individuals would change state to  $n_{s1}$  differed inversely between the  
 304 resting agents with respect to their social relationships with agents already in  $s1$ . The probability  
 305 of an individual  $i$  to change state under the social hypothesis was:

$$\psi_{i,s} = \min \left\{ \frac{1}{\Delta T_{01,s} - \Delta t_i}, \lambda_s + C \sum_{k \in s, k \neq i} a_{ik} \right\}$$

306 where  $k \in s$  means that individual  $k$  is in state  $s$ . We simulated two types of the social index  
 307  $a_{ik}$ ; ‘unit-level’ (only intra-unit) in model Ca, and ‘herd-level’ (both intra- and inter-unit)  
 308 association network in the model Da to investigate whether individuals made decisions based  
 309 only on the members of the same unit or on all herd individuals.

310 In models Cb and Db, the proportion of the joiner to the non-joiner mattered. The  
 311 probability of an individual  $i$  becoming a joiner  $j+1$  under the social hypothesis was:

$$\psi_{i,s1} = \min \left\{ \frac{1}{\Delta T_{01,s1} - \Delta t_i}, \lambda_{s1} + C \frac{\sum_{k \in s1, k \neq i} a_{ik}}{\sum_{k \in s2, k \neq i} a_{ik}} \right\}$$

312

313 *Model setup:* At the group level, the collective state  $S(t)$  can be described at time  $t$  by  
314 the number  $n_m$  of individuals which are moving at that time (for a given group size  $N$ , the  
315 number  $n_r$  of resting individuals is always  $N - n_m$ ).

316 The number of individuals, individual identities, and social relationships of the  
317 observed herd were included in the model. Thus, the number of agents  $N$  was fixed to 123. The  
318 model is time-dependent with each time-step representing one minute. At the start of simulation,  
319 30% of the agents were resting ( $n_r = 37$ ). This 30% came from the average percentage of resting  
320 horses through observation. This value was consistent with the other studies of feral horses  
321 (Boyd and Keiper, 2005). We implemented the probability of changing state  $\lambda_i$  of each agent.  
322 We did not implement any ecological barriers in the model, as usually the horses foraged in a  
323 flat area with almost no obstacles (i.e., trees or rocks).

324

325

#### 326 **(e) Statistical analyses**

327 To evaluate the model fit, we compared the number of horses changing states and  
328 synchronization rate of simulated data to those of observed data.

329 For both  $P_{m,r}$  and  $P_{r,m}$ , we plotted how many individuals changed state after the  
330 synchronization phase started in each 30-minute window (e.g. 0–30, 30–60, 60–90 min...). We  
331 refer to this number as  $\Delta n_s$  ( $\Delta n_r$  is for  $P_{m,r}$  and  $\Delta n_s$  for  $P_{r,m}$ ). We fitted the observed data to a  
332 quadratic function that crosses (0,0), i.e.,  $ax^2+bx$ , using linear regression in the R environment.  
333 We evaluated the models by comparing the simulated data to observed data using the  
334 Kolmogorov-Smirnov (K-S) test.

335 We calculated the correlation between the synchronization rate per dyad of simulated  
336 data and that of observed data and tested its significance using the Mantel and K-S tests. We  
337 evaluated the similarity of the intra-unit synchronization rate distribution to that of the observed  
338 data using the K-S test. We used the Mantel test to evaluate the similarity of the synchronization  
339 rate matrix as a whole, especially the ratio of intra- and inter-unit synchronization rate. Indeed,  
340 the synchronization rate across units were mostly the same among models and never became  
341 better than independent, so we eliminated it from the evaluation. A Mantel test was performed  
342 using the R package ‘vegan’ (Oksanen et al., 2019) and K-S tests were performed using the  
343 function ‘ks.test’ in the R environment.

344 Horses live in a multilevel society and are therefore expected to show social cohesion

345 and behavioural synchronization. We therefore expected the mimetic model, either anonymous  
346 or social, to do better than the independent model (model Aa). Thus, we defined the model Aa  
347 as a null model and compared other models to it. We calculated a score for each model, defined  
348 as the proportion of the model showing better results than the independent one, i.e., when the  
349 model had lower D in K-S tests, and higher r in Mantel tests than those of independent model.  
350 As we have four tests, the score takes a value, 0, 0.25, 0.5, 0.75, or 1.0, where 1.0 is the best.

351

## 352 **Results**

### 353 **(a) Empirical data**

354 The average number of individuals changing states are shown in figures 4 ( $P_{m,r}$ ) and 5  
355 ( $P_{r,m}$ ) (in blue, repeated in all graphs for comparison). Both showed a positive correlation with  
356 the quadratic function (adjusted  $R^2 = 0.79$  in  $P_{m,r}$ ,  $R^2 = 0.81$  in  $P_{r,m}$ , see table S5 for the detailed  
357 results), indicating a mimetic or synchronization process with an increase of the number of  
358 horses in a state followed by a decrease (Sueur et al., 2009; Sueur and Deneubourg, 2011).

359 The average  $\pm$  SD synchronization rate of each pair was  $0.93 \pm 0.03$  within unit and  
360  $0.63 \pm 0.06$  across units in observed data, which showed a strong synchronization based on the  
361 social network of horses. The correlation of the social network and synchronization rate of  
362 observed data was 0.69 (Mantel test, permutation: 9999,  $p < 0.001$ ), indicating a synchronization  
363 process based on social relationships but a part of the process (at least 31%) was not based on  
364 these relationships.

365 The average  $\pm$  SD weight within units and across units was  $19.4 \pm 9.9$  and  $0.26 \pm 0.85$   
366 respectively. This means that we assumed that the same unit members had around 75.9 times  
367 stronger effects on the behaviour than horses from different units in the herd-level hypothesis,  
368 and as units are mixed (different ages, sex and personality), other hypotheses (sex, age and  
369 personality tested separately from the network) are not relevant compared to the social network  
370 which embed all these sociodemographic variables.

371

### 372 **(b) Simulations**

373 Concerning the states' synchronization, four models showed parabolic shape correlated  
374 to observed data (table 2) in moving to resting phase (absolute anonymous: Figure 5Ba,  
375 proportional anonymous: 5Bb, herd level absolute social: 5Da, and herd-level proportional  
376 social: 5Db) and resting to moving phase (absolute anonymous: Figure 6Ba, proportional  
377 anonymous: 6Bb, herd level absolute social: 6Da, and herd-level proportional social: 6Db).

378 Agents merely changed their states in the other three models (independent: Figure 5A and 6A,  
379 unit-level absolute social: 5Ca and 6Ca, and unit-level proportional social: 5Cb and 6Cb).

380 Figure 7 shows the comparison between model-generated synchronization scores and  
381 synchronization scores from the empirical data. The model simulations that did not consider  
382 social relationships (i.e., independent, absolute anonymous, and proportional anonymous  
383 models) showed a lot of overlap in the histograms of intra-unit and inter-unit synchronization  
384 scores, unlike the observed data which show clear separation between intra and inter-unit  
385 synchronization scores (figure 7).

386 Overall, the herd-level social (model Da) and the herd-level proportional social (model  
387 Db) always had better scores than the independent (null) model, while the others did not. K-S  
388 tests for  $\Delta n_m$  and  $\Delta n_r$  were better in the herd-level social model, and the K-S test and the  
389 Mantel test were better in the herd-level proportional social model (table 2).

390

391

## 392 **Discussion**

393 We compared seven models to find which one best explained the dynamics of  
394 behavioural states, specifically the synchronization of resting versus movement, in horses'  
395 multilevel society. Among the models tested, only the herd-level absolute social model (model  
396 Da) and the herd-level proportional social model (model Db) matched the empirical data better  
397 than the null model (model A). Considering the simplicity of the model, which does not contain  
398 any environmental effect and temporal changes of agents' positions, and the fact that the model  
399 is based on temporally sparse data with 30 minutes intervals, we argue that these two models  
400 were quite fitted to the empirical data. These models indicate that synchronization in a  
401 multilevel society of horses can be largely explained by their internal rhythm plus the social  
402 network. Model Da (herd-level absolute) was better at explaining the number of horses  
403 changing states, while model Db (herd-level proportional) more successfully explained the  
404 synchronization rate distribution, thus the mechanism most likely lies somewhere between them  
405 (for instance, these two mechanisms switch at a certain threshold). It is also possible that we  
406 could not evaluate the fitness of two models accurately enough because of the sparse observed  
407 data. Although a multilevel society is considered among the most complex social structures in  
408 animals (Grueter et al., 2017), our study suggested that the collective behavioural pattern could  
409 be represented by simple mathematical models.

410 The observation data had higher intra- and inter-unit synchronization rate, and the

411 number of individuals that change state after the synchronization phase started ( $\Delta n_s$  and  $\Delta n_m$ )  
412 had a higher peak than those of the herd-level hypothesis (models Da and Db) in most of the  
413 parameter sets.  $\Delta n_s$  represents the speed of the behaviour spread, and synchronization rate  
414 corresponds to the stability of the state (for example, whether horses keep resting when many  
415 individuals are resting), suggesting that both are stronger in the observed data than those in  
416 simulation. According to the models with different parameter sets, the fitness to  $\Delta n_s$  value and to  
417 synchronization rate was negatively correlated with each other, suggesting the trade-off between  
418 them (Figure S2). Indeed, the higher the speed of synchronization, the lower the stability. To  
419 further improve the fitness of the model, we may need to consider a parameter sets and/or  
420 equations which establish compatibility between the speed and the stability. For example, in the  
421 current model, shorter refractory time period could enhance the speed but lower the stability,  
422 because agents will definitely wake up after the refractory time passes. We may need to either  
423 change the equation of the refractory time period or enhance the speed without changing the  
424 refractory time period.

425         Most previous studies of non-multilevel societies suggested local interaction within a  
426 few body lengths or the several nearest neighbours (Couzin and Krause, 2003). However, our  
427 result showed that inter-individual interaction also occurred among spatially separated  
428 individuals. According to Maeda et al., (2021), the average nearest unit distance was 39.3 m  
429 (around 26.2 times a horse's body length) and the nearest individual within the same unit was  
430 3.2 m. It is still not sure whether horses have a global view, or if they just respond to the several  
431 nearest units, but either way this is a notably large distance compared to other studies. Horses  
432 usually did not create any significant cue (e.g., vocalization) when they start moving/resting,  
433 thus it is likely that horses have an ability to recognize the behaviour of both horses of the same  
434 units and other units simultaneously. In a multilevel society, it is important to keep the inter-unit  
435 distance moderate. This avoids competition between units while keeping the cohesion of the  
436 higher-level group to obtain the benefits of being in a large group, such as protection from  
437 bachelors or predators (Swedell and Plummer, 2012), and may have led to the evolution of such  
438 cognitive ability.

439         Besides the temporal positions of units, another factor which may be important is  
440 individual and unit attributes. The integration of the network in the model already considered  
441 individual differences in network connectedness and centrality caused from such variations in  
442 attributes. In the intra-unit level, some individual characteristics could affect the leaderships of  
443 collective departure in a multilevel society (lactation: Fischhoff et al., 2007; personality: Briard

444 et al., 2015; intra-unit dominance rank: Krueger et al., 2014; Papageorgiou and Farine, 2020),  
445 but it is unclear that those factors affect the behavioural propagation in herd-level (but see  
446 Fischhoff et al., 2007). We presume most of these individual level attributes would become less  
447 effective in inter-unit level synchronization because each unit has individuals with different  
448 status, and the synchronization inside units are far stronger than those across units. In herd level  
449 synchronization, we may be able to assume that all individuals in the same units always perform  
450 the same behaviour (all resting or all moving), so individual differences should be largely  
451 diluted. However, it is still possible that unit-level social status exists and effects the  
452 synchronization pattern. In this horse population, our previous study found that large harems  
453 tend to occupy the centre and had higher strength centrality (the sum of the edge that connects  
454 to a node), while small harems and AMUs stayed on the periphery, suggesting the existence of  
455 inter-unit level dominance rank (Maeda et al., 2021). It may therefore be possible that such  
456 dominant units are more influential. Our data was too sparse in time scale to observe how  
457 behaviour propagated across units and include horses' positional dynamics in a model, which is  
458 needed to investigate horses' recognizable distance and the effect of the attributes. Finer-scaled  
459 observation will be needed for the further investigation on the underlying mechanism in  
460 herd-level synchronization.

461         Because of the simplicity of our model, our methodology is highly applicable to other  
462 species. The spatial structure of multilevel societies is still poorly understood, but it may vary  
463 among species, habitat environments and contexts. For example, a migrating herd of  
464 Przewalski's horses (*Equus ferus przewalskii*) was relatively aggregated (Ozogany and Vicsek,  
465 2014), but a higher level group of Peruvian red uakari (*Cacajao calvus*) was much more  
466 sparsely distributed, like the horses in our study (the nearest unit distance was 10–15 m or  
467 more) (Bowler et al., 2012). It is also highly possible that other species forming multilevel  
468 societies show an ability to recognize the behaviour of other units which are located far away,  
469 (especially in species that live in open fields, like equines and cetaceans). Horses do not have  
470 specific timing for resting and it is unlikely that all individuals sleep at the same time, thus to  
471 test whether agents only perceive units nearby, we needed to add a formula representing  
472 collective movement in the current model. However, some animals that form multilevel  
473 societies, such as primates, often sleep together at the same location during the night (Grueter et  
474 al., 2012). In that case, we do not need to consider the movement, making it easier to test the  
475 range of their perception. It is important to discover whether the association index could also  
476 explain the behavioural decisions of other multilevel social animals with various special



477 structures to generalize our knowledge of behavioural synchronization in multilevel societies.

478 Overall, our study provides new insights into the behavioural synchronization process  
479 and contributes to the understanding of collective behaviours in complex animal societies. The  
480 organization of multilevel societies has become a topic of great interest recently, but studies  
481 have so far tended to focus on social relationships and many questions are still unresolved. We  
482 hope that our study on collective synchronization will contribute to an understanding of the  
483 evolution and functional significance of multi-level animal societies.

484

#### 485 **Limitations of the study**

486 Our model could not consider the temporal changes in position of horses including concurrent  
487 inter-individual and inter-group distances, although it is highly likely that the behaviour of units  
488 is more affected by closer units. While horses are in the moving state, their movement is likely  
489 to be synchronized with each other, so we may need to consider movement synchronization in a  
490 model as well as behavioural state synchronization. Developing inter-individual and intergroup  
491 distances in the model can be done indirectly through giving variance using stochasticity to  
492 relationships implemented in the model. For calculating the parameter on stochasticity, more  
493 temporally fine scaled data may be needed. Orthomosaic data has the advantage of obtaining the  
494 accurate and identified positions of individuals in a wide-ranged group, but it could obtain only  
495 temporally sparse data. Optimizing the data collection method, such as combination of the video  
496 recording from drones and orthomosaics, should be needed to further develop the model. In  
497 addition, the variations of parameter sets we tested were limited, making it difficult to hold a  
498 detailed discussion on the function of the parameters.

499

500

#### 501 **Author Contributions**

502 SH and SY managed the project. TM collected data. CS designed the models and TM and CS conducted the analysis  
503 and interpreted the results. TM wrote the manuscript with help from CS, SH, and SY. All authors have approved the  
504 final version of the manuscript and agree to be accountable for all aspects of the work related to the accuracy and  
505 integrity of any part of the work.

506

#### 507 **Acknowledgements**

508 The authors are grateful to Viana do Castelo city and villagers in Montaria for supporting us and providing hospitality  
509 during our stay. We thank Monamie Ringhofer, Sakiho Ochi, Pandora Pinto, Renata Mendonça, Sota Inoue, Carlos

510 Pereira and Tetsuro Matsuzawa for their great help with this project. Cédric Sueur is a junior member of Academic  
511 Institute of France. This study was supported by KAKENHI (No. 19H05736, 17H0582, 19H00629 to Shinya  
512 Yamamoto, No. 18H05524 to Satoshi Hirata, No. 16H06283 to Tetsuro Matsuzawa, No. 20J20702 to Tamao Maeda),  
513 JSPS LGP-U04 to Tamao Maeda, and Kyoto University SPIRITS to Shinya Yamamoto.

514

515 **Data availability**

516 The relevant data and models are available at the following link: <https://doi.org/10.5061/dryad.c866t1g3b>

517

518 **Declaration of Interests**

519 The authors declare no competing interests.

520

521

522

523 **References**

- 524 Ancel, A., Beaulieu, M., Le Maho, Y., Gilbert, C., 2009. Emperor penguin mates: Keeping  
525 together in the crowd. *Proc. R. Soc. B Biol. Sci.* 276, 2163–2169.  
526 <https://doi.org/10.1098/rspb.2009.0140>
- 527 Bialek, W., Cavagna, A., Giardina, I., Mora, T., Pohl, O., Silvestri, E., Viale, M., Walczak,  
528 A.M., 2014. Social interactions dominate speed control in poising natural flocks near  
529 criticality. *Proc. Natl. Acad. Sci. U. S. A.* 111, 7212–7217.  
530 <https://doi.org/10.1073/pnas.1324045111>
- 531 Bonenfant, C., Loe, L.E., Mysterud, A., Langvatn, R., Stenseth, N.C., Gaillard, J.M., Klein, F.,  
532 2004. Multiple causes of sexual segregation in European red deer: Enlightenments from  
533 varying breeding phenology at high and low latitude. *Proc. R. Soc. B Biol. Sci.* 271,  
534 883–892. <https://doi.org/10.1098/rspb.2003.2661>
- 535 Bourjade, M., Thierry, B., Maumy, M., Petit, O., 2009. Decision-making in przewalski horses  
536 (*equus ferus przewalskii*) is driven by the ecological contexts of collective movements.  
537 *Ethology* 115, 321–330. <https://doi.org/10.1111/j.1439-0310.2009.01614.x>
- 538 Bowler, M., Knogge, C., Heymann, E.W., Zinner, D., 2012. Multilevel societies in new world  
539 primates? Flexibility may characterize the organization of Peruvian red uakaris (*Cacajao*  
540 *calvus uacayalii*). *Int. J. Primatol.* 33, 1110–1124.  
541 <https://doi.org/10.1007/s10764-012-9603-6>
- 542 Boyd, L., Keiper, R., 2005. Behavioural ecology of feral horses, in: Mills, D.S., McDonnell,  
543 S.M. (Eds.), *The Domestic Horse: The Origins, Development and Management of Its*  
544 *Behaviour*. Cambridge University Press, Cambridge, America, p. 55–82.
- 545 Briard, L., Dorn, C., Petit, O., 2015. Personality and Affinities Play a Key Role in the  
546 Organisation of Collective Movements in a Group of Domestic Horses. *Ethology* 121,  
547 888–902. <https://doi.org/10.1111/eth.12402>
- 548 Cairns, S.J., Schwager, S.J., 1987. A comparison of association indices. *Anim. Behav.* 35,  
549 1454–1469. [https://doi.org/10.1016/S0003-3472\(87\)80018-0](https://doi.org/10.1016/S0003-3472(87)80018-0)
- 550 Centola, D., 2010. The spread of behavior in an online social network experiment. *Science*  
551 (80-. ). 329, 1194–1197. <https://doi.org/10.1126/science.1189910>
- 552 Charpentier, M., Pelé, M., Renoult, J., Sueur, C., 2021. Social data collection and analyses, in:  
553 Salguero-Gómez, R., Gamelon, M. (Eds.), *Demographic Methods across the Tree of Life*.  
554 Oxford University Press, Oxford, UK.

- 555 Couzin, I.D., 2018. Synchronization: The Key to Effective Communication in Animal  
556 Collectives. *Trends Cogn. Sci.* <https://doi.org/10.1016/j.tics.2018.08.001>
- 557 Couzin, I.D., 2009. Collective cognition in animal groups. *Trends Cogn. Sci.*  
558 <https://doi.org/10.1016/j.tics.2008.10.002>
- 559 Couzin, I.D., Krause, J., 2003. Self-Organization and Collective Behavior in Vertebrates. *Adv.*  
560 *Study Behav.* 32, 1–75. [https://doi.org/10.1016/S0065-3454\(03\)01001-5](https://doi.org/10.1016/S0065-3454(03)01001-5)
- 561 Duranton, C., Gaunet, F., 2016. Behavioural synchronization from an ethological perspective:  
562 Overview of its adaptive value. *Adapt. Behav.* <https://doi.org/10.1177/1059712316644966>
- 563 Fischhoff, I.R., Sundaresan, S.R., Cordingley, J., Larkin, H.M., Sellier, M.J., Rubenstein, D.I.,  
564 2007. Social relationships and reproductive state influence leadership roles in movements  
565 of plains zebra, *Equus burchellii*. *Anim. Behav.* 73, 825–831.  
566 <https://doi.org/10.1016/j.anbehav.2006.10.012>
- 567 Grueter, C.C., Matsuda, I., Zhang, P., Zinner, D., 2012. Multilevel societies in primates and  
568 other mammals: Introduction to the special issue. *Int. J. Primatol.* 33, 993–1001.  
569 <https://doi.org/10.1007/s10764-012-9614-3>
- 570 Grueter, C.C., Qi, X., Li, B., Li, M., 2017. Multilevel societies. *Curr. Biol.* 27, 984–986.  
571 <https://doi.org/10.1016/j.cub.2017.06.063>
- 572 Grueter, C.C., Qi, X., Zinner, D., Bergman, T., Li, M., Xiang, Z., Zhu, P., Migliano, A.B.,  
573 Miller, A., Krützen, M., Fischer, J., Rubenstein, D.I., Vidya, T.N.C., Li, B., Cantor, M.,  
574 Swedell, L., 2020. Multilevel Organisation of Animal Sociality. *Trends Ecol. Evol.*  
575 <https://doi.org/10.1016/j.tree.2020.05.003>
- 576 Inoue, S., Yamamoto, S., Ringhofer, M., Mendonça, R.S., Pereira, C., Hirata, S., 2019. Spatial  
577 positioning of individuals in a group of feral horses: a case study using drone technology.  
578 *Mammal Res.* 64, 249–259. <https://doi.org/10.1007/s13364-018-0400-2>
- 579 Kastberger, G., Schmelzer, E., Kranner, I., 2008. Social Waves in Giant Honeybees Repel  
580 Hornets. *PLoS One* 3, 3141. <https://doi.org/10.1371/journal.pone.0003141>
- 581 King, A.J., Douglas, C.M.S., Huchard, E., Isaac, N.J.B., Cowlshaw, G., 2008. Dominance and  
582 Affiliation Mediate Despotism in a Social Primate. *Curr. Biol.* 18, 1833–1838.  
583 <https://doi.org/10.1016/j.cub.2008.10.048>
- 584 King, A.J., Sueur, C., Huchard, E., Cowlshaw, G., 2011. A rule-of-thumb based on social  
585 affiliation explains collective movements in desert baboons. *Anim. Behav.* 82, 1337–1345.  
586 <https://doi.org/10.1016/j.anbehav.2011.09.017>
- 587 Krueger, K., Flauger, B., Farmer, K., Hemelrijk, C., 2014. Movement initiation in groups of

- 588 feral horses. *Behav. Processes* 103, 91–101. <https://doi.org/10.1016/j.beproc.2013.10.007>
- 589 Maeda, T., Ochi, S., Ringhofer, M., Sosa, S., Sueur, C., Hirata, S., Yamamoto, S., 2021. Aerial  
590 drone observations identified a multilevel society in feral horses. *Sci. Rep.* 11, 71.  
591 <https://doi.org/10.1038/s41598-020-79790-1>
- 592 McIntosh, D., 2006. Spontaneous facial mimicry, liking and emotional contagion. *Polish Psychol.*  
593 *Bull.* 37, 31–42.
- 594 Mooring, M.S., Reising, D.D., Osborne, E.R., Kanallakan, A.L., Hall, B.M., Schaad, E.W.,  
595 Wiseman, D.S., Huber, R.R., 2005. Sexual segregation in bison: A test of multiple  
596 hypotheses. *Behaviour* 142, 897–927. <https://doi.org/10.1163/1568539055010110>
- 597 Moscovice, L.R., Sueur, C., Aureli, F., 2020. How socio-ecological factors influence the  
598 differentiation of social relationships: An integrated conceptual framework: Differentiation  
599 of social relationships. *Biol. Lett.* 16. <https://doi.org/10.1098/rsbl.2020.0384>
- 600 Oksanen, J., Blanchet, F.G., Friendly, M., Kindt, R., Legendre, P., Mcglinn, D., Minchin, P.R.,  
601 O'hara, R.B., Simpson, G.L., Solymos, P., Henry, M., Stevens, H., Szoecs, E., Maintainer,  
602 H.W., 2019. Package “vegan” Title Community Ecology Package Version 2.5-6.
- 603 Ozogany, K., Vicsek, T., 2014. Modeling leadership hierarchy in multilevel animal societies.  
604 *Cornell Univ. Libr. Physics*, arXiv:1403.0260.
- 605 Ozogány, K., Vicsek, T., 2014. Modeling the Emergence of Modular Leadership Hierarchy  
606 During the Collective Motion of Herds Made of Harems. *J. Stat. Phys.* 158, 628–646.  
607 <https://doi.org/10.1007/s10955-014-1131-7>
- 608 Papageorgiou, D., Christensen, C., Gall, G.E.C., Klarevas-Irby, J.A., Nyaguthii, B., Couzin, I.D.,  
609 Farine, D.R., 2019. The multilevel society of a small-brained bird. *Curr. Biol.* 29,  
610 R1120–R1121. <https://doi.org/10.1016/J.CUB.2019.09.072>
- 611 Papageorgiou, D., Farine, D.R., 2020. Shared decision-making allows subordinates to lead  
612 when dominants monopolize resources. *Sci. Adv.* 6, 5881–5906.  
613 <https://doi.org/10.1126/sciadv.aba5881>
- 614 Qi, X.G., Garber, P.A., Ji, W., Huang, Z.P., Huang, K., Zhang, Peng, Guo, S.T., Wang, X.W.,  
615 He, G., Zhang, Pei, Li, B.G., 2014. Satellite telemetry and social modeling offer new  
616 insights into the origin of primate multilevel societies. *Nat. Commun.* 5.  
617 <https://doi.org/10.1038/ncomms6296>
- 618 Ringhofer, M., Inoue, S., Mendonça, R.S., Pereira, C., Matsuzawa, T., Hirata, S., Yamamoto, S.,  
619 2017. Comparison of the social systems of primates and feral horses: data from a newly  
620 established horse research site on Serra D'Arga, northern Portugal. *Primates* 58, 479–484.

- 621 <https://doi.org/10.1007/s10329-017-0614-y>
- 622 Rubenstein, D.I., Hack, M., 2004. Natural and sexual selection and the evolution of multi-level  
623 societies: insights from zebras with comparisons to primates, in: *Sexual Selection in*  
624 *Primates: New and Comparative Perspectives*. pp. 266–279.  
625 <https://doi.org/10.1017/CBO9780511542459.017>
- 626 Schreier, A.L., Swedell, L., 2009. The fourth level of social structure in a multi-level society:  
627 Ecological and social functions of clans in Hamadryas Baboons. *Am. J. Primatol.* 71,  
628 948–955. <https://doi.org/10.1002/ajp.20736>
- 629 Schroeder, N.M., Panebianco, A., Musso, R.G., Carmanchahi, P., 2020. An experimental  
630 approach to evaluate the potential of drones in terrestrial mammal research: A gregarious  
631 ungulate as a study model. *R. Soc. Open Sci.* 7. <https://doi.org/10.1098/rsos.191482>
- 632 Snyder-Mackler, N., Beehner, J.C., Bergman, T.J., 2012. Defining Higher Levels in the  
633 Multilevel Societies of Geladas (*Theropithecus gelada*). *Int. J. Primatol.* 33, 1054–1068.  
634 <https://doi.org/10.1007/s10764-012-9584-5>
- 635 Sueur, C., Deneubourg, J.L., 2011. Self-Organization in Primates: Understanding the Rules  
636 Underlying Collective Movements. *Int. J. Primatol.* 32, 1413–1432.  
637 <https://doi.org/10.1007/s10764-011-9520-0>
- 638 Sueur, C., Deneubourg, J.L., Petit, O., 2012. From social network (centralized vs. decentralized)  
639 to collective decision-making (unshared vs. shared consensus). *PLoS One* 7.  
640 <https://doi.org/10.1371/journal.pone.0032566>
- 641 Sueur, C., Deneubourg, J.L., Petit, O., 2011. From the first intention movement to the last  
642 joiner: Macaques combine mimetic rules to optimize their collective decisions. *Proc. R.*  
643 *Soc. B Biol. Sci.* 278, 1697–1704. <https://doi.org/10.1098/rspb.2010.2084>
- 644 Sueur, Cédric, King, A.J., Conradt, L., Kerth, G., Lusseau, D., Mettke-Hofmann, C., Schaffner,  
645 C.M., Williams, L., Zinner, D., Aureli, F., 2011. Collective decision-making and  
646 fission-fusion dynamics: A conceptual framework. *Oikos* 120, 1608–1617.  
647 <https://doi.org/10.1111/j.1600-0706.2011.19685.x>
- 648 Sueur, C., Petit, O., Deneubourg, J.L., 2010. Short-term group fission processes in macaques: A  
649 social networking approach. *J. Exp. Biol.* 213, 1338–1346.  
650 <https://doi.org/10.1242/jeb.039016>
- 651 Sueur, C., Petit, O., Deneubourg, J.L., 2009. Selective mimetism at departure in collective  
652 movements of *Macaca tonkeana*: an experimental and theoretical approach. *Anim. Behav.*  
653 78, 1087–1095. <https://doi.org/10.1016/j.anbehav.2009.07.029>

654 Swedell, L., Plummer, T., 2012. A papionin multilevel society as a model for hominin social  
655 evolution. *Int. J. Primatol.* 33, 1165–1193. <https://doi.org/10.1007/s10764-012-9600-9>  
656 Torney, C.J., Lamont, M., Debell, L., Angohiatok, R.J., Leclerc, L.M., Berdahl, A.M., 2018.  
657 Inferring the rules of social interaction in migrating caribou. *Philos. Trans. R. Soc. B Biol.*  
658 *Sci.* 373, 20170385. <https://doi.org/10.1098/rstb.2017.0385>  
659 Wand, M., 2015. Package ‘KernSmooth’ [WWW Document]. URL  
660 <https://cran.r-project.org/web/packages/KernSmooth/index.html> (accessed 5.31.19).  
661 Wand, M.P., 1999. Data-based choice of histogram bin width. *Am. Stat.* 53, 174.  
662 <https://doi.org/10.2307/2685743>  
663

### 664 **Figure and Tables Legends**

665 **Figure 1.** A graphic representation of synchronisation models. The dots represent individual  
666 agents and the cluster of dots represent units. When agents/units were connected with lines, it  
667 means that their states were affected by each other. The width of the lines represents the strength  
668 of synchronisation.

669 **Figure 2.** Overall procedure of the research. (a) We took aerial photos of horses using drones.  
670 (b) These successive photos were stitched together to create an orthomosaic. (c) Individuals in  
671 orthomosaics were identified, and the positional and behavioural data of horses were obtained.  
672 We then constructed the social network using inter-individual distance data. The photograph is  
673 also used in Maeda et al., (2021) published in Scientific Reports.

674 **Figure 3.** Histogram of inter-individual distances showing clear bimodality. The distance of the  
675 first peak and the second peak could be considered as the most frequent value of inter-individual  
676 distances within a unit and between units, respectively. The trough between two peaks  
677 represents the threshold that divides the intra- and inter-unit association. This figure is reprinted  
678 from Figure 2(a) in Maeda et al., (2021).

679 Figure 4. The explanation of  $P_{m,r}$  and  $P_{r,m}$ .

680 **Figure 5.** The change of the number of resting individuals in  $P_{m,r}$ . The pink points are data  
681 obtained from simulation and blue are those from the observation. Data was fitted to quadratic  
682 function that cross (0,0), i.e.,  $ax^2+bx$ .  $R^2$  is the coefficient of determination of the regression for  
683 simulated data. Aa: independent, Ba: absolute anonymous, Bb: proportional anonymous, Ca:  
684 unit-level absolute social, Cb: unit-level proportional social, Da: herd-level absolute social, and  
685 Db: herd-level proportional social models.

686 **Figure 6.** The change of the number of resting individuals in  $P_{r,m}$ . Same as Figure, 4.



687 **Figure 7.** Histograms of the synchronisation rate. White and grey bars represent the observed  
688 value of synchronisation rate across units and within units, respectively. Pink and blue bars  
689 represent those of simulated data across units and within units, respectively. Aa: independent,  
690 Ba: absolute anonymous, Bb: proportional anonymous, Ca: unit-level absolute social, Cb:  
691 unit-level proportional social, Da: herd-level absolute social, and Db: herd-level proportional  
692 social models.

693

694 Table 1. The explanation and values of parameters. The value of the parameter was written  
695 when it is a constant. See also supplementary appendix for the detailed explanation of how to  
696 obtain the parameter value. ‘-’ means that the value can change dynamically.

697 Table 2. The result of the evaluation of  $\Delta n$  and the synchronisation rate obtained from the  
698 simulations. “Eval” (evaluation) is “+” when the result is better than independent model and “-”  
699 when not. The model with smaller  $D$  and larger  $r$  is considered as the better. Score is the  
700 percentage of the tests which showed better results than independent (null) model.

701

702 **Figures and Tables**

**(A) Independent**

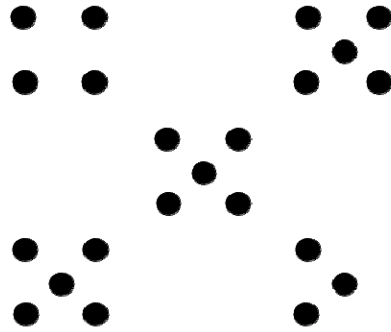

**(B) Anonymous**

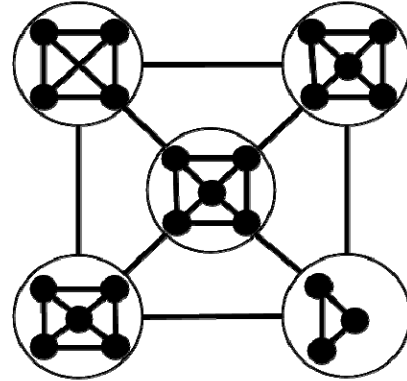

**(C) Unit-level social**

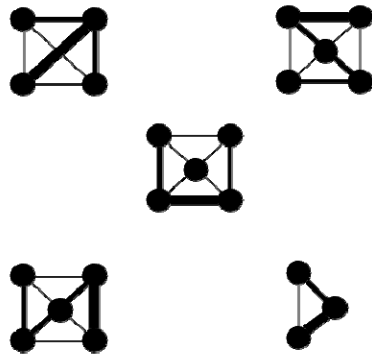

**(D) Herd-level social**

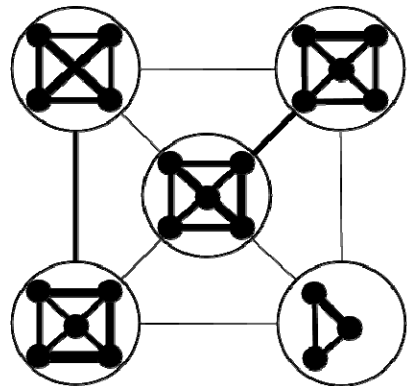

703

704 **Figure 1**

705

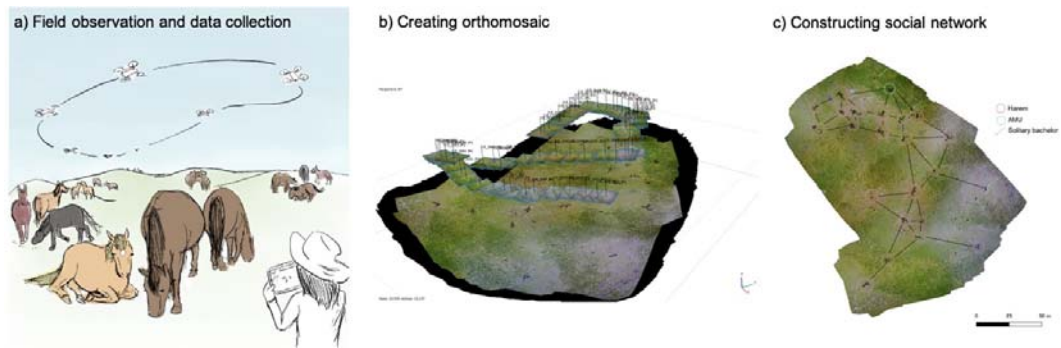

706

707 **Figure 2**

708

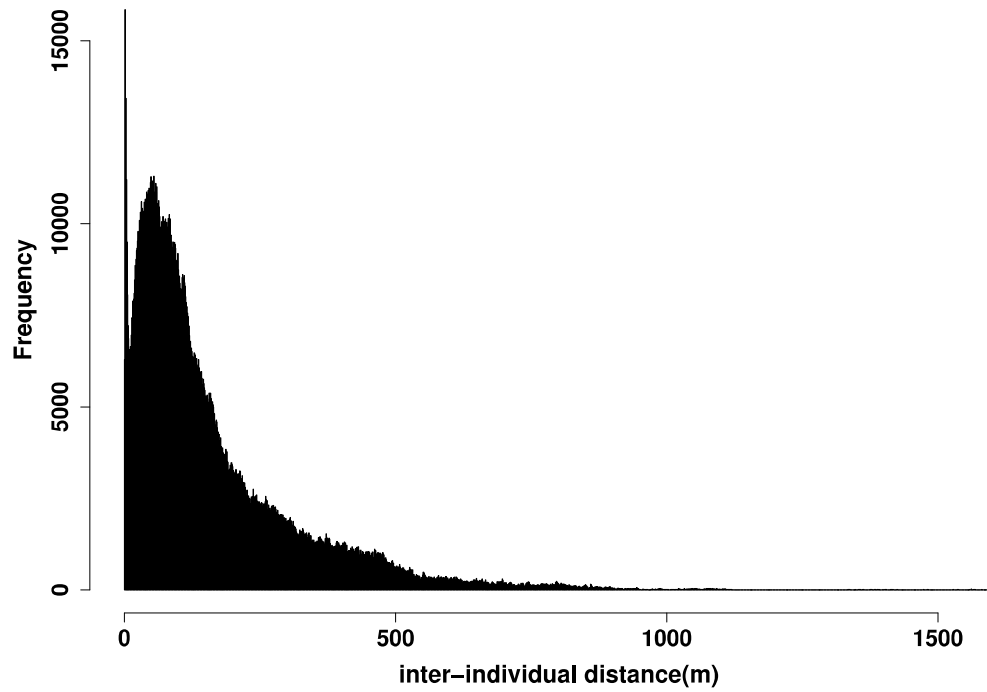

710 **Figure 3**

711

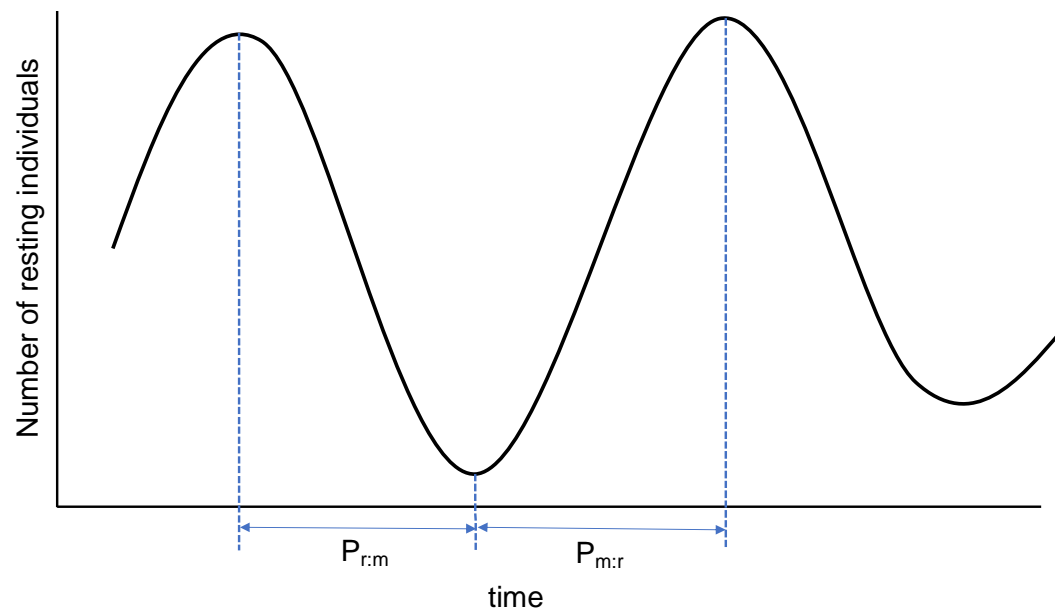

713 **Figure 4**

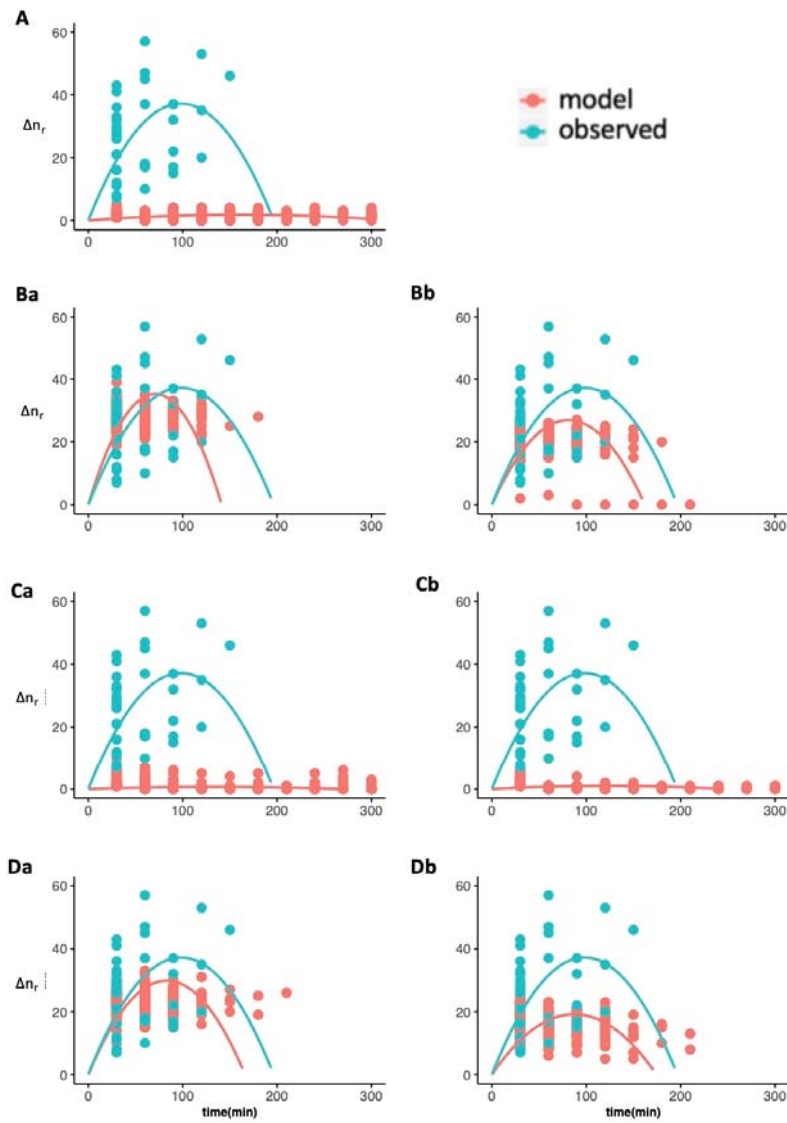

714

715 **Figure 5**

716

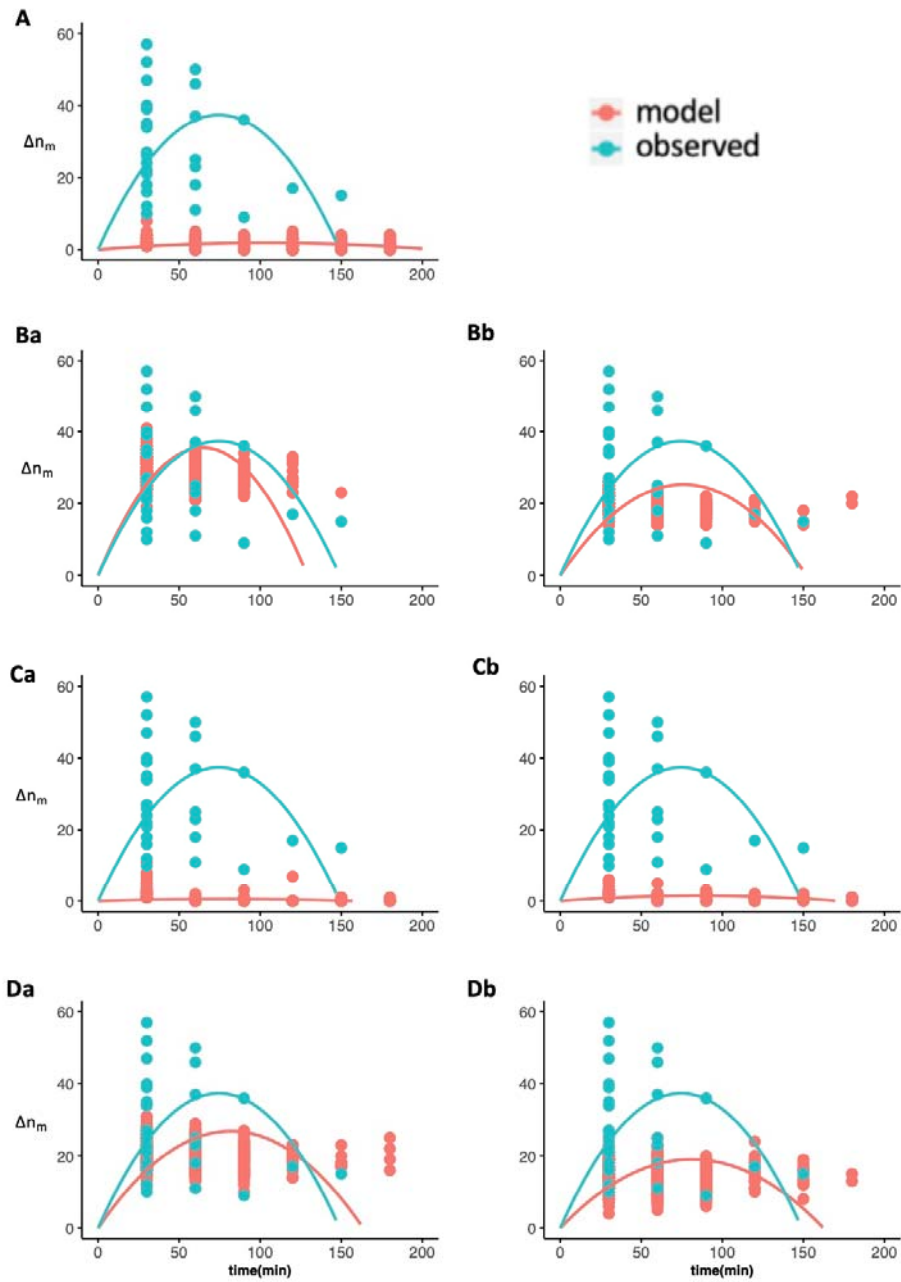

717

718 **Figure 6**

719

| parameter | value | value | Definition |
|-----------|-------|-------|------------|
|-----------|-------|-------|------------|

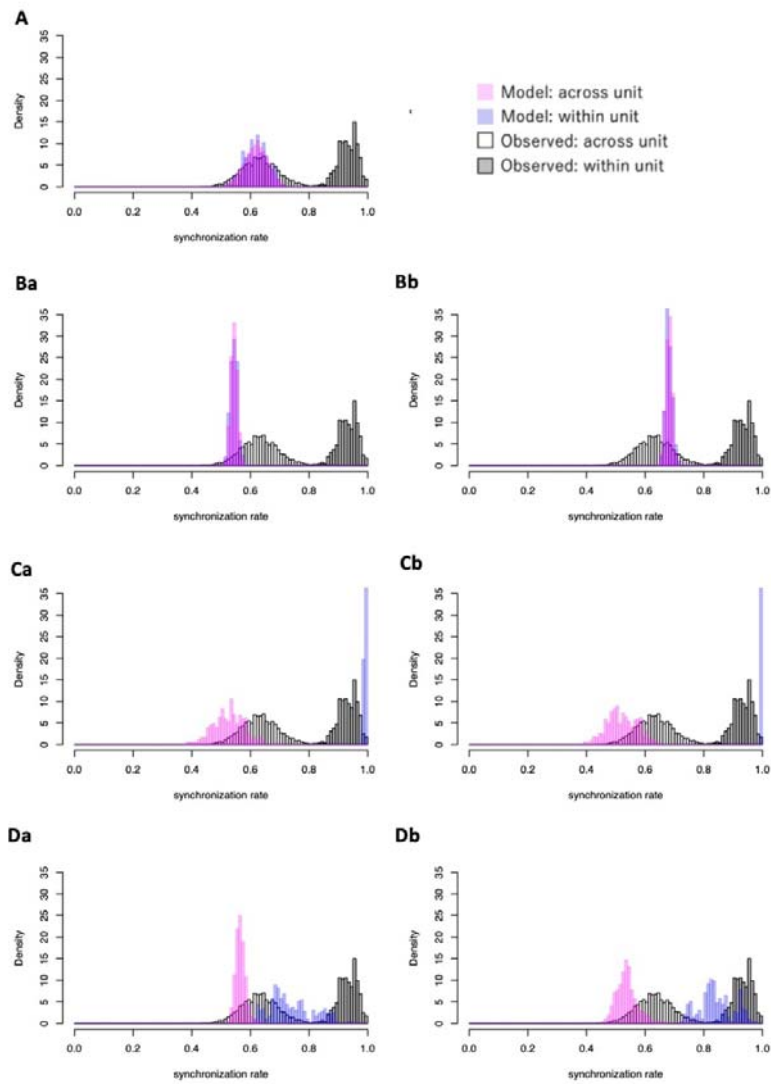

720

721 **Figure 7**

722



|                      | (resting)      | (moving)  |                                                                                                                                                                                   |
|----------------------|----------------|-----------|-----------------------------------------------------------------------------------------------------------------------------------------------------------------------------------|
| $a_{ki}$             | social network |           | social network weight between individuals $k$ and $i$ .                                                                                                                           |
| $C$                  | 0.426          | 0.796     | mimetic coefficient                                                                                                                                                               |
| $\Psi_1$             | 0.030          | 0.040     | A probability of starting resting/moving. Equal to $N\lambda_i$                                                                                                                   |
| $\Psi_j$             | -              | -         | Probability per unit time that one of the $n$ agents became the $j$ th joiner (corresponding to the hypothesis where the identities of individuals are not taken into an account) |
| $\Psi_{i,s}$         | -              | -         | Probability per unit time of an individual $i$ changing the state $s$ (the refractory time period and the identities of individuals are taken into an account.)                   |
| $\lambda_{i,s}$      | 0.00016        | 0.00033   | The average probability per unit time of an individual $i$ changing the state $s$ .                                                                                               |
| $\Delta T_{01,s}$    | 50 (min)       | 25 (min)  | Refractory time period. time elapsed from the end of the previous event.                                                                                                          |
| $\Delta T_{j,j-1,s}$ | 2.3 (min)      | 1.3 (min) | time elapsed between the state change of the joiner $j-1$ and the state change of the joiner $j$ . The inverse of $C$ .                                                           |
| $\Delta t_i$         | -              | -         | time elapsed from the previous state change of individual $i$                                                                                                                     |
| $N$                  | 123            |           | number of individuals in a herd                                                                                                                                                   |
| $n_s$                | -              | -         | Number of the individuals in the state $s$ (resting/moving).                                                                                                                      |

723 **Table 1**

724

725 **Table 2**

| model                             | K-S test ( $\Delta n_m, P_{r,m}$ ) |       |        | K-S test ( $\Delta n_r, P_{m,r}$ ) |       |        | K-S test<br>(sync rate of intra-unit) |       |        | Mantel test<br>(sync rate) |        |        | score |             |
|-----------------------------------|------------------------------------|-------|--------|------------------------------------|-------|--------|---------------------------------------|-------|--------|----------------------------|--------|--------|-------|-------------|
|                                   | D                                  | p     | eval   | r                                  | p     | eval   | D                                     | p     | eval   | r                          | p      | eval   |       |             |
| independent<br>(null model)       | A                                  | 0.980 | 0.010  |                                    | 0.980 | 0.010  |                                       | 1.000 | <0.001 |                            | 0.367  | 0.010  |       |             |
| absolute<br>anonymous             | Ba                                 | 0.215 | 0.989  | +                                  | 0.306 | 0.989  | +                                     | 1.000 | <0.001 | -                          | -0.050 | 0.989  | -     | <b>0.50</b> |
| proportional<br>anonymous         | Bb                                 | 0.564 | 0.947  | +                                  | 0.561 | 0.947  | +                                     | 1.000 | <0.001 | -                          | -0.057 | 0.947  | -     | <b>0.50</b> |
| unit-level<br>absolute social     | Ca                                 | 0.993 | <0.001 | -                                  | 0.995 | <0.001 | -                                     | 0.973 | <0.001 | +                          | 0.572  | <0.001 | +     | <b>0.50</b> |
| unit-level<br>proportional social | Cb                                 | 0.980 | <0.001 | -                                  | 0.980 | <0.001 | -                                     | 0.993 | <0.001 | +                          | 0.627  | <0.001 | +     | <b>0.50</b> |
| herd-level<br>absolute social     | Da                                 | 0.537 | <0.001 | +                                  | 0.577 | <0.001 | +                                     | 0.915 | <0.001 | +                          | 0.601  | <0.001 | +     | <b>1</b>    |
| herd-level<br>proportional social | Db                                 | 0.698 | <0.001 | +                                  | 0.714 | <0.001 | +                                     | 0.714 | <0.001 | +                          | 0.634  | <0.001 | +     | <b>1</b>    |
